# Supplementary material for: GenomeTrakr proficiency testing for foodborne pathogen surveillance: an exercise from 2015
Source: PubMed Central journal article supplement (PMC6113870; doi:10.1099/mgen.0.000185), 2018-06-15
Supplement: mgen-4-185-s001.pdf [file mgen-4-185-s001.pdf]

Supplemental Figure 1. Insert sizes

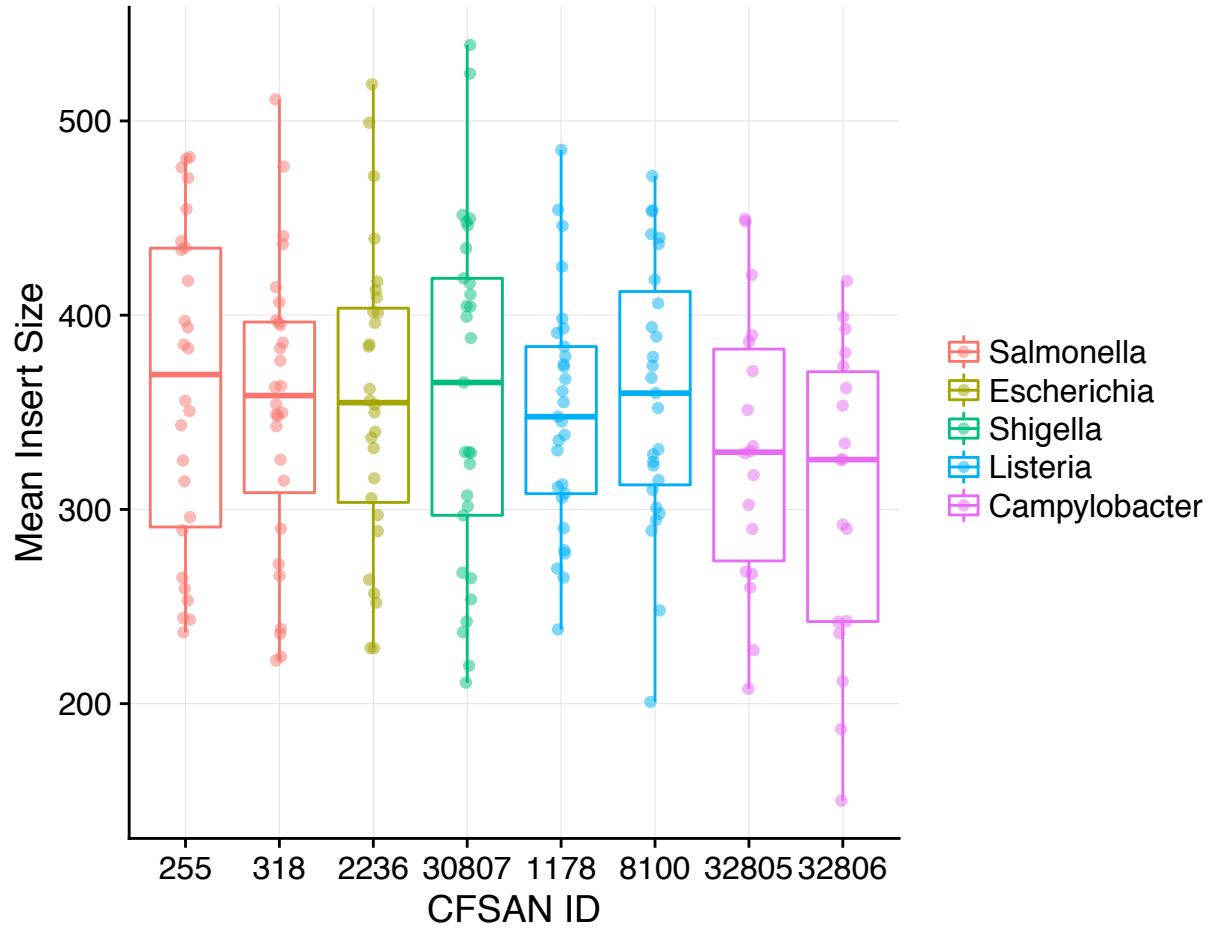

**Supplemental Table 1.** Raw data and summary statistics for each individual sequence in the exercise. NCBI SRA accessions included for access to the raw data.

| Masked ID | Strain Name | Organism                                               | NCBI BioSample | SRA Run    | Run Metrics    |               |         |           |       |       |           | Isolate Metrics |         |         |            |           |        |            |        |                |         |        |    |
|-----------|-------------|--------------------------------------------------------|----------------|------------|----------------|---------------|---------|-----------|-------|-------|-----------|-----------------|---------|---------|------------|-----------|--------|------------|--------|----------------|---------|--------|----|
|           |             |                                                        |                |            | ClusterDensity | PerClustersPF | Reads_M | ReadsPF_M | Yield | Q30   | SeqLength | Reads           | MeanR1  | MeanR2  | PercMapped | MeanDepth | SNPs   | MeanInsert | NG50   | GenomeFraction | Contigs |        |    |
| 1         | CFSAN000255 | Salmonella enterica subsp. enterica serovar Montevideo | SAMN07210937   | SRRS805961 | 463            | 97.46         | 9.04    | 8.81      | 4.4   | 89.92 | 35-251    | 1781176         | 36      | 34.1    | 99.01      | 58.75     | 1      | 355.96     | 52111  | 98.678         | 218     |        |    |
| 1         | CFSAN000318 | Salmonella enterica subsp. enterica serovar Heidelberg | SAMN07210938   | SRRS805705 | 463            | 97.46         | 9.04    | 8.81      | 4.4   | 89.92 | 35-251    | 2616190         | 36.2    | 34.4    | 98.83      | 74.74     | 0      | 325.67     | 170933 | 99.143         | 135     |        |    |
| 1         | CFSAN001178 | Listeria monocytogenes                                 | SAMN07210944   | SRRS805561 | 463            | 97.46         | 9.04    | 8.81      | 4.4   | 89.92 | 35-251    | 310516          | 37.3    | 35.9    | 99.33      | 17.64     | 1      | 378.76     | 13613  | 96.106         | 425     |        |    |
| 1         | CFSAN002236 | Escherichia coli                                       | SAMN07210945   | SRRS805563 | 463            | 97.46         | 9.04    | 8.81      | 4.4   | 89.92 | 35-251    | 1964546         | 36.1    | 33.9    | 98.96      | 58.45     | 0      | 353.95     | 64687  | 98.405         | 215     |        |    |
| 1         | CFSAN008100 | Listeria monocytogenes                                 | SAMN07210931   | SRRS805555 | 463            | 97.46         | 9.04    | 8.81      | 4.4   | 89.92 | 35-251    | 1008642         | 36.3    | 34.7    | 99.12      | 47.31     | 0      | 322.58     | 20306  | 97.123         | 342     |        |    |
| 1         | CFSAN030807 | Shigella sonnei                                        | SAMN07210932   | SRRS805956 | 463            | 97.46         | 9.04    | 8.81      | 4.4   | 89.92 | 35-251    | 1490828         | 36.1    | 34      | 98.94      | 48.46     | 0      | 416.42     | 18750  | 87.998         | 551     |        |    |
| 1         | CFSAN032805 | Campylobacter coli                                     | SAMN07210933   | SRRS805476 | 463            | 97.46         | 9.04    | 8.81      | 4.4   | 89.92 | 35-251    | 649628          | 37.5    | 37.1    | 99.55      | 44.15     | 0      | 267.97     | 4536   | 91.464         | 633     |        |    |
| 1         | CFSAN032806 | Campylobacter jejuni                                   | SAMN07210930   | SRRS805477 | 463            | 97.46         | 9.04    | 8.81      | 4.4   | 89.92 | 35-251    | 696852          | 37.5    | 37      | 99.24      | 39.31     | 1      | 242.51     | 2895   | 85.47          | 908     |        |    |
| 2         | CFSAN000255 | Salmonella enterica subsp. enterica serovar Montevideo | SAMN07210937   | SRRS805962 | NA             | NA            | NA      | NA        | NA    | NA    | NA        | NA              | 35-251  | 1925082 | 35.2       | 30.9      | 98.06  | 67.19      | 0      | 384.86         | 422657  | 99.173 | 68 |
| 2         | CFSAN000318 | Salmonella enterica subsp. enterica serovar Heidelberg | SAMN07210938   | SRRS805848 | NA             | NA            | NA      | NA        | NA    | NA    | NA        | 35-251          | 2289710 | 35      | 34.2       | 99.03     | 78.62  | 0          | 385.84 | 259788         | 99.216  | 99     |    |
| 2         | CFSAN001178 | Listeria monocytogenes                                 | SAMN07210944   | SRRS805564 | NA             | NA            | NA      | NA        | NA    | NA    | NA        | 35-251          | 2026694 | 36.3    | 34.7       | 99.54     | 111.2  | 1          | 367.18 | 548130         | 99.042  | 37     |    |
| 2         | CFSAN002236 | Escherichia coli                                       | SAMN07210945   | SRRS805562 | NA             | NA            | NA      | NA        | NA    | NA    | NA        | 35-251          | 1599342 | 35      | 32.7       | 98.84     | 54.36  | 0          | 396.01 | 186967         | 98.774  | 154    |    |
| 2         | CFSAN008100 | Listeria monocytogenes                                 | SAMN07210931   | SRRS805558 | NA             | NA            | NA      | NA        | NA    | NA    | NA        | 35-251          | 1609768 | 36.2    | 34.2       | 99.35     | 84.45  | 0          | 359.85 | 353282         | 98.634  | 47     |    |
| 2         | CFSAN030807 | Shigella sonnei                                        | SAMN07210932   | SRRS805971 | NA             | NA            | NA      | NA        | NA    | NA    | NA        | 35-251          | 1619846 | 35.2    | 31.5       | 98.21     | 50.91  | 0          | 399.21 | 21765          | 88.882  | 521    |    |
| 3         | CFSAN000255 | Salmonella enterica subsp. enterica serovar Montevideo | SAMN07210937   | SRRS806408 | NA             | NA            | NA      | NA        | NA    | NA    | NA        | 35-251          | 1885178 | 35.4    | 32.7       | 97.35     | 47.13  | 0          | 289.24 | 440987         | 99.177  | 107    |    |
| 3         | CFSAN000318 | Salmonella enterica subsp. enterica serovar Heidelberg | SAMN07210938   | SRRS805856 | NA             | NA            | NA      | NA        | NA    | NA    | NA        | 35-251          | 2112378 | 35.5    | 33         | 97.43     | 47.87  | 0          | 271.84 | 259854         | 99.196  | 96     |    |
| 3         | CFSAN001178 | Listeria monocytogenes                                 | SAMN07210944   | SRRS805579 | NA             | NA            | NA      | NA        | NA    | NA    | NA        | 35-251          | 1767856 | 36.3    | 32.5       | 98.89     | 87.5   | 0          | 345.21 | 476905         | 99.046  | 52     |    |
| 3         | CFSAN002236 | Escherichia coli                                       | SAMN07210945   | SRRS805581 | NA             | NA            | NA      | NA        | NA    | NA    | NA        | 35-251          | 1111480 | 35.3    | 31.2       | 97.47     | 32.86  | 0          | 383.83 | 186967         | 98.783  | 127    |    |
| 3         | CFSAN008100 | Listeria monocytogenes                                 | SAMN07210931   | SRRS805588 | NA             | NA            | NA      | NA        | NA    | NA    | NA        | 35-251          | 2360694 | 36.5    | 32.4       | 98.27     | 96.33  | 0          | 294.59 | 353282         | 98.44   | 66     |    |
| 3         | CFSAN030807 | Shigella sonnei                                        | SAMN07210932   | SRRS806406 | NA             | NA            | NA      | NA        | NA    | NA    | NA        | 35-251          | 1685838 | 35.7    | 31.2       | 96.54     | 39.66  | 0          | 329.08 | 21765          | 89.07   | 552    |    |
| 3         | CFSAN032805 | Campylobacter coli                                     | SAMN07210933   | SRRS805517 | NA             | NA            | NA      | NA        | NA    | NA    | NA        | 35-251          | 2102226 | 36.6    | 34         | 99.34     | 173.67 | 0          | 330.06 | 169981         | 98.913  | 88     |    |
| 3         | CFSAN032806 | Campylobacter jejuni                                   | SAMN07210930   | SRRS805512 | NA             | NA            | NA      | NA        | NA    | NA    | NA        | 35-251          | 1631928 | 36.6    | 33.6       | 99.15     | 137.79 | 1          | 373.68 | 104440         | 97.221  | 88     |    |
| 4         | CFSAN000255 | Salmonella enterica subsp. enterica serovar Montevideo | SAMN07210937   | SRRS806411 | 887            | 90.84         | 16.99   | 15.44     | 7.93  | 84.15 | 35-251    | 1372822         | 34.8    | 30      | 97.33      | 51.36     | 0      | 454.63     | 511299 | 99.183         | 110     |        |    |
| 4         | CFSAN000318 | Salmonella enterica subsp. enterica serovar Heidelberg | SAMN07210938   | SRRS805855 | 887            | 90.84         | 16.99   | 15.44     | 7.93  | 84.15 | 35-251    | 1790644         | 35      | 31.7    | 98.24      | 61.04     | 0      | 414.43     | 23382  | 99.215         | 144     |        |    |
| 4         | CFSAN001178 | Listeria monocytogenes                                 | SAMN07210944   | SRRS805857 | 887            | 90.84         | 16.99   | 15.44     | 7.93  | 84.15 | 35-251    | 2000512         | 36.4    | 33.2    | 99.1       | 112.41    | 1      | 393.21     | 477130 | 98.801         | 118     |        |    |
| 4         | CFSAN002236 | Escherichia coli                                       | SAMN07210945   | SRRS80584  | 887            | 90.84         | 16.99   | 15.44     | 7.93  | 84.15 | 35-251    | 2262594         | 35.4    | 29.3    | 96.59      | 73.27     | 0      | 412.96     | 190130 | 98.748         | 211     |        |    |
| 4         | CFSAN008100 | Listeria monocytogenes                                 | SAMN07210931   | SRRS805853 | 887            | 90.84         | 16.99   | 15.44     | 7.93  | 84.15 | 35-251    | 1802820         | 36.4    | 33.7    | 99.21      | 103.43    | 0      | 418.34     | 353282 | 98.541         | 87      |        |    |
| 4         | CFSAN030807 | Shigella sonnei                                        | SAMN07210932   | SRRS806409 | 887            | 90.84         | 16.99   | 15.44     | 7.93  | 84.15 | 35-251    | 2116716         | 35.4    | 30.1    | 97.42      | 67.85     | 0      | 434.43     | 21765  | 88.893         | 621     |        |    |
| 4         | CFSAN032805 | Campylobacter coli                                     | SAMN07210933   | SRRS805521 | 887            | 90.84         | 16.99   | 15.44     | 7.93  | 84.15 | 35-251    | 2555182         | 36.8    | 35.5    | 99.49      | 214.38    | 0      | 332.53     | 169981 | 98.895         | 93      |        |    |
| 4         | CFSAN032806 | Campylobacter jejuni                                   | SAMN07210930   | SRRS805514 | 887            | 90.84         | 16.99   | 15.44     | 7.93  | 84.15 | 35-251    | 1689236         | 36.7    | 35.5    | 99.43      | 155       | 1      | 399.09     | 104440 | 97.216         | 98      |        |    |
| 5         | CFSAN000255 | Salmonella enterica subsp. enterica serovar Montevideo | SAMN07210937   | SRRS806430 | 909            | 91.22         | 17.02   | 15.52     | 7.98  | 83.53 | 35-251    | 1735198         | 35.3    | 31      | 97.93      | 65.12     | 0      | 438.06     | 511299 | 99.172         | 134     |        |    |
| 5         | CFSAN000318 | Salmonella enterica subsp. enterica serovar Heidelberg | SAMN07210938   | SRRS806438 | 909            | 91.22         | 17.02   | 15.52     | 7.98  | 83.53 | 35-251    | 1828176         | 35.3    | 30.9    | 97.8       | 64.47     | 1      | 440.66     | 378695 | 99.218         | 117     |        |    |
| 5         | CFSAN001178 | Listeria monocytogenes                                 | SAMN07210944   | SRRS805973 | 909            | 91.22         | 17.02   | 15.52     | 7.98  | 83.53 | 35-251    | 1870882         | 36.4    | 31.3    | 98.18      | 108.6     | 0      | 424.95     | 548130 | 99.046         | 117     |        |    |
| 5         | CFSAN002236 | Escherichia coli                                       | SAMN07210945   | SRRS805591 | 909            | 91.22         | 17.02   | 15.52     | 7.98  | 83.53 | 35-251    | 1671228         | 35.5    | 32.9    | 98.77      | 59.02     | 0      | 439.42     | 189159 | 98.762         | 202     |        |    |
| 5         | CFSAN008100 | Listeria monocytogenes                                 | SAMN07210931   | SRRS805870 | 909            | 91.22         | 17.02   | 15.52     | 7.98  | 83.53 | 35-251    | 1606654         | 36.4    | 34.4    | 99.21      | 93.52     | 0      | 436.73     | 353282 | 98.541         | 184     |        |    |
| 5         | CFSAN030807 | Shigella sonnei                                        | SAMN07210932   | SRRS806440 | 909            | 91.22         | 17.02   | 15.52     | 7.98  | 83.53 | 35-251    | 1662266         | 35.5    | 32.1    | 98.21      | 55.37     | 0      | 449.75     | 21765  | 88.878         | 568     |        |    |
| 5         | CFSAN032805 | Campylobacter coli                                     | SAMN07210933   | SRRS805540 | 909            | 91.22         | 17.02   | 15.52     | 7.98  | 83.53 | 35-251    | 1648470         | 36.7    | 35.1    | 99.39      | 157.05    | 0      | 386.3      | 169981 | 98.915         | 225     |        |    |
| 5         | CFSAN032806 | Campylobacter jejuni                                   | SAMN07210930   | SRRS805539 | 909            | 91.22         | 17.02   | 15.52     | 7.98  | 83.53 | 35-251    | 1168714         | 36.6    | 33.5    | 98.91      | 104.89    | 1      | 417.63     | 104440 | 97.23          | 141     |        |    |
| 6         | CFSAN000255 | Salmonella enterica subsp. enterica serovar Montevideo | SAMN07210937   | SRRS911613 | 1203           | 88.51         | 22.69   | 20.09     | 10.32 | 75.57 | 35-251    | 3356280         | 34.7    | 29.3    | 96.65      | 93.84     | 0      | 325.15     | 422825 | 99.192         | 302     |        |    |
| 6         | CFSAN000255 | Salmonella enterica subsp. enterica serovar Montevideo | SAMN07210937   | SRRS911552 | 1203           | 88.51         | 22.69   | 20.09     | 10.32 | 75.57 | 35-251    | 2469650         | 35.1    | 30.5    | 96.28      | 54.17     | 0      | 253.16     | 441276 | 99.178         | 314     |        |    |
| 6         | CFSAN000318 | Salmonella enterica subsp. enterica serovar Heidelberg | SAMN07210938   | SRRS910649 | 1335           | 88.97         | 25.19   | 22.42     | 11.52 | 73.12 | 35-251    | 3007268         | 35.4    | 31.7    | 96.8       | 60.58     | 0      | 236        | 259788 | 99.218         | 367     |        |    |
| 6         | CFSAN000318 | Salmonella enterica subsp. enterica serovar Heidelberg | SAMN07210938   | SRRS910647 | 1203           | 88.51         | 22.69   | 20.09     | 10.32 | 75.57 | 35-251    | 3095464         | 35.1    | 29.1    | 93.99      | 54.24     | 0      | 224.24     | 259788 | 99.207         | 278     |        |    |
| 6         | CFSAN001178 | Listeria monocytogenes                                 | SAMN07210944   | SRRS910641 | 1203           | 88.51         | 22.69   | 20.09     | 10.32 | 75.57 | 35-251    | 2852070         | 35.9    | 31.6    | 97.78      | 126.56    | 1      | 311.6      | 477130 | 99.056         | 455     |        |    |
| 6         | CFSAN001178 | Listeria monocytogenes                                 | SAMN07210944   | SRRS910644 | 1203           | 88.51         | 22.69   | 20.09     | 10.32 | 75.57 | 35-251    | 2927350         | 36      | 30      | 96.73      | 111.9     | 0      | 277.34     | 331773 | 99.039         | 180     |        |    |
| 6         | CFSAN002236 | Escherichia coli                                       | SAMN07210945   | SRRS910643 | 1203           | 88.51         | 22.69   | 20.09     | 10.32 | 75.57 | 35-251    | 2893216         | 34.8    | 25.5    | 91.34      | 67.84     | 0      | 336.95     | 190130 | 98.767         | 267     |        |    |
| 6         | CFSAN002236 | Escherichia coli                                       | SAMN07210945   | SRRS912122 | 1203           | 88.51         | 22.69   | 20.09     | 10.32 | 75.57 | 35-251    | 4052296         | 35.4    | 32.5    | 97.48      | 77.69     | 0      | 228.64     | 186967 | 98.774         | 426     |        |    |
| 6         | CFSAN008100 | Listeria monocytogenes                                 | SAMN07210931   | SRRS911615 | 1203           | 88.51         | 22.69   | 20.09     | 10.32 | 75.57 | 35-251    | 2948494         | 36      | 30.6    | 97.51      | 125.05    | 0      | 310.12     | 353282 | 98.61          | 362     |        |    |
| 6         | CFSAN008100 | Listeria monocytogenes                                 | SAMN07210931   | SRRS911618 | 1203           | 88.51         | 22.69   | 20.09     | 10.32 | 75.57 | 35-251    | 2029442         | 35.7    | 29.3    | 97.11      | 105.1     | 0      | 388.98     | 353282 | 98.575         | 271     |        |    |
| 6         | CFSAN030807 | Shigella sonnei                                        | SAMN07210932   | SRRS910645 | 1335           | 88.97         | 25.19   | 22.42     | 11.52 | 73.12 | 35-251    | 2712880         | 35.6    | 32.5    | 97.42      | 50.48     | 0      | 236.73     | 21425  | 89.325         | 710     |        |    |
| 6         | CFSAN030807 | Shigella sonnei                                        | SAMN07210932   | SRRS911619 | 1335           | 88.97         | 25.19   | 22.42     | 11.52 | 73.12 | 35-251    | 3073864         | 35.5    | 31.3    | 96.18      | 49.5      | 0      | 210.84     | 21425  | 89.523         | 669     |        |    |
| 6         | CFSAN030807 | Shigella sonnei                                        | SAMN07210932   | SRRS912124 | 1203           | 88.51         | 22.69   | 20.09     | 10.32 | 75.57 | 35-251    | 1925424         | 35.1    | 29.4    | 95.83      | 42.04     | 0      | 301.56     | 21940  | 89.207         | 662     |        |    |
| 6         | CFSAN032805 | Campylobacter coli                                     | SAMN07210933   | SRRS912123 | 1203           | 88.51         | 22.69   | 20.09     | 10.32 | 75.57 | 35-251    | 2191054         | 36.2    | 33.5    | 98.78      | 201.13    | 0      | 371.24     | 169981 | 98.903         | 357     |        |    |
| 6         | CFSAN032806 | Campylobacter coli                                     | SAMN07210933   | SRRS912126 | 1203           | 88.51         | 22.69   | 20.09     | 10.32 | 75.57 | 35-251    | 2934246         | 36.1    | 33.6    | 98.96      | 230.91    | 0      | 317.68     | 169981 | 98.881         | 326     |        |    |
| 6         | CFSAN032806 | Campylobacter jejuni                                   | SAMN07210930   | SRRS912125 | 1203           | 88.51         | 22.69   | 20.09     | 10.32 | 75.57 | 35-25     |                 |         |         |            |           |        |            |        |                |         |        |    |

|    |             |                                                        |              |            |      |       |       |       |       |       |        |         |      |      |       |        |   |        |        |        |     |
|----|-------------|--------------------------------------------------------|--------------|------------|------|-------|-------|-------|-------|-------|--------|---------|------|------|-------|--------|---|--------|--------|--------|-----|
| 9  | CFSAN00255  | Salmonella enterica subsp. enterica serovar Montevideo | SAMN07210937 | SRRS806402 | 862  | 87.63 | 16.08 | 14.09 | 7.24  | 78.34 | 35-251 | 1462788 | 33.4 | 31   | 97.51 | 46.38  | 1 | 397.09 | 146900 | 99.081 | 111 |
| 9  | CFSAN000318 | Salmonella enterica subsp. enterica serovar Heidelberg | SAMN07210938 | SRRS805864 | 862  | 87.63 | 16.08 | 14.09 | 7.24  | 78.34 | 35-251 | 1626256 | 33.2 | 31.1 | 97.82 | 49.94  | 1 | 382.86 | 149654 | 99.123 | 182 |
| 9  | CFSAN001178 | Listeria monocytogenes                                 | SAMN07210944 | SRRS805582 | 862  | 87.63 | 16.08 | 14.09 | 7.24  | 78.34 | 35-251 | 1778044 | 35.3 | 32.5 | 98.87 | 85.06  | 0 | 335.56 | 255510 | 99.037 | 52  |
| 9  | CFSAN002236 | Escherichia coli                                       | SAMN07210945 | SRRS805578 | 862  | 87.63 | 16.08 | 14.09 | 7.24  | 78.34 | 35-251 | 884930  | 31.7 | 29.9 | 97.6  | 27.79  | 0 | 417.33 | 77890  | 98.202 | 259 |
| 9  | CFSAN008100 | Listeria monocytogenes                                 | SAMN07210931 | SRRS805580 | 862  | 87.63 | 16.08 | 14.09 | 7.24  | 78.34 | 35-251 | 1202306 | 35.2 | 32.6 | 98.85 | 69.59  | 0 | 439.89 | 285013 | 98.6   | 67  |
| 9  | CFSAN030807 | Shigella sonnei                                        | SAMN07210932 | SRRS806400 | 862  | 87.63 | 16.08 | 14.09 | 7.24  | 78.34 | 35-251 | 1735668 | 33.9 | 30.3 | 97.81 | 51.82  | 0 | 410.65 | 24046  | 88.105 | 591 |
| 9  | CFSAN02805  | Campylobacter coli                                     | SAMN07210933 | SRRS805518 | 862  | 87.63 | 16.08 | 14.09 | 7.24  | 78.34 | 35-251 | 1171920 | 36   | 33.3 | 98.83 | 94.23  | 0 | 328.88 | 82974  | 98.375 | 150 |
| 9  | CFSAN032806 | Campylobacter jejuni                                   | SAMN07210930 | SRRS805511 | 862  | 87.63 | 16.08 | 14.09 | 7.24  | 78.34 | 35-251 | 4300430 | 36.3 | 35.7 | 98.42 | 148.25 | 1 | 150.06 | 104400 | 97.194 | 225 |
| 10 | CFSAN00255  | Salmonella enterica subsp. enterica serovar Montevideo | SAMN07210937 | SRR2534386 | 658  | 95.88 | 12.69 | 12.16 | 6.25  | 81.46 | 35-251 | 2329734 | 36.1 | 34.7 | 98.53 | 52.58  | 1 | 244.12 | 440987 | 99.197 | 67  |
| 10 | CFSAN000318 | Salmonella enterica subsp. enterica serovar Heidelberg | SAMN07210938 | SRRS805862 | 658  | 95.88 | 12.69 | 12.16 | 6.25  | 81.46 | 35-251 | 1923960 | 36   | 34.9 | 98.56 | 40.57  | 2 | 238.57 | 423368 | 99.144 | 107 |
| 10 | CFSAN001178 | Listeria monocytogenes                                 | SAMN07210944 | SRR2534153 | 658  | 95.88 | 12.69 | 12.16 | 6.25  | 81.46 | 35-251 | 2395440 | 37   | 36.5 | 99.23 | 85.22  | 2 | 238.19 | 476505 | 99.05  | 45  |
| 10 | CFSAN002236 | Escherichia coli                                       | SAMN07210945 | SRR2534155 | 658  | 95.88 | 12.69 | 12.16 | 6.25  | 81.46 | 35-251 | 1062040 | 36.1 | 34.2 | 98.35 | 21.06  | 4 | 228.49 | 169204 | 98.241 | 140 |
| 10 | CFSAN008100 | Listeria monocytogenes                                 | SAMN07210931 | SRR2534154 | 658  | 95.88 | 12.69 | 12.16 | 6.25  | 81.46 | 35-251 | 1420018 | 36.9 | 35.8 | 98.77 | 42.24  | 0 | 200.88 | 353282 | 98.596 | 59  |
| 10 | CFSAN030807 | Shigella sonnei                                        | SAMN07210932 | SRR2534156 | 658  | 95.88 | 12.69 | 12.16 | 6.25  | 81.46 | 35-251 | 1716870 | 36.1 | 34.3 | 98.23 | 30.43  | 0 | 219.56 | 21425  | 92.467 | 595 |
| 10 | CFSAN02805  | Campylobacter coli                                     | SAMN07210933 | SRR2534157 | 658  | 95.88 | 12.69 | 12.16 | 6.25  | 81.46 | 35-251 | 848990  | 37.2 | 36.9 | 99.06 | 49.81  | 0 | 227.51 | 169981 | 98.866 | 76  |
| 10 | CFSAN032806 | Campylobacter jejuni                                   | SAMN07210930 | SRR2534158 | 658  | 95.88 | 12.69 | 12.16 | 6.25  | 81.46 | 35-251 | 1146398 | 37.3 | 37   | 99.12 | 64.88  | 1 | 236.33 | 104440 | 97.216 | 63  |
| 11 | CFSAN00255  | Salmonella enterica subsp. enterica serovar Montevideo | SAMN07210937 | SRRS806452 | 1307 | 80.84 | 23.53 | 19.06 | 9.8   | 73.78 | 35-251 | 2524066 | 34.3 | 30.1 | 95.3  | 51.14  | 0 | 264.82 | 422825 | 99.16  | 144 |
| 11 | CFSAN000318 | Salmonella enterica subsp. enterica serovar Montevideo | SAMN07210937 | SRRS806454 | 1307 | 80.84 | 23.53 | 19.06 | 9.8   | 73.78 | 35-251 | 2176430 | 34.3 | 30   | 95.95 | 49.38  | 0 | 296.04 | 440987 | 99.177 | 120 |
| 11 | CFSAN000318 | Salmonella enterica subsp. enterica serovar Heidelberg | SAMN07210938 | SRRS806450 | 1307 | 80.84 | 23.53 | 19.06 | 9.8   | 73.78 | 35-251 | 2153018 | 34.3 | 30.8 | 95.88 | 42.58  | 0 | 265.88 | 248823 | 99.209 | 167 |
| 11 | CFSAN000318 | Salmonella enterica subsp. enterica serovar Heidelberg | SAMN07210938 | SRRS806434 | 1307 | 80.84 | 23.53 | 19.06 | 9.8   | 73.78 | 35-251 | 1945436 | 34.1 | 29.5 | 96.76 | 51.74  | 0 | 354.14 | 259788 | 99.225 | 133 |
| 11 | CFSAN000318 | Salmonella enterica subsp. enterica serovar Heidelberg | SAMN07210938 | SRRS806439 | 1307 | 80.84 | 23.53 | 19.06 | 9.8   | 73.78 | 35-251 | 2249202 | 34   | 30.5 | 96.15 | 48.13  | 0 | 290.1  | 259854 | 99.188 | 110 |
| 11 | CFSAN001178 | Listeria monocytogenes                                 | SAMN07210944 | SRRS805869 | 1307 | 80.84 | 23.53 | 19.06 | 9.8   | 73.78 | 35-251 | 2348796 | 35.9 | 32.3 | 98.63 | 88.23  | 0 | 278.99 | 476905 | 99.05  | 86  |
| 11 | CFSAN001178 | Listeria monocytogenes                                 | SAMN07210944 | SRRS805867 | 1307 | 80.84 | 23.53 | 19.06 | 9.8   | 73.78 | 35-251 | 2683900 | 35.8 | 32.7 | 98.94 | 107.34 | 0 | 290.33 | 476905 | 99.05  | 60  |
| 11 | CFSAN001178 | Listeria monocytogenes                                 | SAMN07210944 | SRRS805874 | 1307 | 80.84 | 23.53 | 19.06 | 9.8   | 73.78 | 35-251 | 2320362 | 35.7 | 32.3 | 98.91 | 97.42  | 0 | 308.1  | 476905 | 99.05  | 58  |
| 11 | CFSAN002236 | Escherichia coli                                       | SAMN07210945 | SRRS805595 | 1307 | 80.84 | 23.53 | 19.06 | 9.8   | 73.78 | 35-251 | 2599952 | 34.9 | 28.9 | 94.51 | 51.41  | 0 | 288.78 | 190130 | 98.756 | 147 |
| 11 | CFSAN002236 | Escherichia coli                                       | SAMN07210945 | SRRS805594 | 1307 | 80.84 | 23.53 | 19.06 | 9.8   | 73.78 | 35-251 | 2210396 | 34.2 | 29.1 | 96.92 | 57.01  | 0 | 349.92 | 183863 | 98.755 | 136 |
| 11 | CFSAN002236 | Escherichia coli                                       | SAMN07210945 | SRRS805593 | 1307 | 80.84 | 23.53 | 19.06 | 9.8   | 73.78 | 35-251 | 2115694 | 34.2 | 30.7 | 97.36 | 50.06  | 0 | 316.03 | 183863 | 98.745 | 131 |
| 11 | CFSAN008100 | Listeria monocytogenes                                 | SAMN07210931 | SRRS805866 | 1307 | 80.84 | 23.53 | 19.06 | 9.8   | 73.78 | 35-251 | 2148818 | 35.8 | 32.6 | 98.58 | 82.33  | 2 | 289.09 | 353282 | 98.487 | 115 |
| 11 | CFSAN008100 | Listeria monocytogenes                                 | SAMN07210931 | SRRS805877 | 1307 | 80.84 | 23.53 | 19.06 | 9.8   | 73.78 | 35-251 | 2418500 | 35.8 | 33   | 98.67 | 96.43  | 2 | 297.87 | 353282 | 98.498 | 98  |
| 11 | CFSAN030807 | Shigella sonnei                                        | SAMN07210932 | SRRS806436 | 1307 | 80.84 | 23.53 | 19.06 | 9.8   | 73.78 | 35-251 | 2539056 | 34.8 | 29.4 | 95.37 | 49.29  | 0 | 296.96 | 21397  | 89.129 | 543 |
| 11 | CFSAN030807 | Shigella sonnei                                        | SAMN07210932 | SRRS806443 | 1307 | 80.84 | 23.53 | 19.06 | 9.8   | 73.78 | 35-251 | 1856764 | 34.3 | 30.2 | 96.98 | 41.74  | 0 | 329.56 | 21397  | 89.088 | 522 |
| 11 | CFSAN030807 | Shigella sonnei                                        | SAMN07210932 | SRRS806469 | 1307 | 80.84 | 23.53 | 19.06 | 9.8   | 73.78 | 35-251 | 2623012 | 34.5 | 29.3 | 94.9  | 44.06  | 0 | 264.55 | 21425  | 89.61  | 511 |
| 12 | CFSAN000255 | Salmonella enterica subsp. enterica serovar Montevideo | SAMN07210937 | SRRS806463 | 920  | 92.71 | 17.26 | 16.01 | 8.23  | 82.24 | 35-251 | 1365820 | 34.9 | 32.2 | 98.7  | 50.79  | 0 | 417.65 | 149376 | 99.023 | 127 |
| 12 | CFSAN000255 | Salmonella enterica subsp. enterica serovar Montevideo | SAMN07210937 | SRRS806470 | 920  | 92.71 | 17.26 | 16.01 | 8.23  | 82.24 | 35-251 | 2814482 | 35.8 | 33.7 | 97.99 | 60.83  | 0 | 236.72 | 440987 | 99.171 | 95  |
| 12 | CFSAN000318 | Salmonella enterica subsp. enterica serovar Heidelberg | SAMN07210938 | SRRS806466 | 920  | 92.71 | 17.26 | 16.01 | 8.23  | 82.24 | 35-251 | 1573848 | 35.1 | 32.3 | 98.51 | 53.93  | 0 | 406.7  | 114831 | 99.116 | 155 |
| 12 | CFSAN000318 | Salmonella enterica subsp. enterica serovar Heidelberg | SAMN07210938 | SRRS806460 | 920  | 92.71 | 17.26 | 16.01 | 8.23  | 82.24 | 35-251 | 2486336 | 35.5 | 34.5 | 97.87 | 48.52  | 0 | 222.23 | 259854 | 99.199 | 151 |
| 12 | CFSAN001178 | Listeria monocytogenes                                 | SAMN07210944 | SRRS805878 | 920  | 92.71 | 17.26 | 16.01 | 8.23  | 82.24 | 35-251 | 1296836 | 36.6 | 34.4 | 99.46 | 74.81  | 1 | 398.22 | 477130 | 99.054 | 60  |
| 12 | CFSAN001178 | Listeria monocytogenes                                 | SAMN07210944 | SRRS805876 | 920  | 92.71 | 17.26 | 16.01 | 8.23  | 82.24 | 35-251 | 2543890 | 36.7 | 35.9 | 99.44 | 101.47 | 1 | 264.88 | 548130 | 99.046 | 68  |
| 12 | CFSAN002236 | Escherichia coli                                       | SAMN07210945 | SRRS805592 | 920  | 92.71 | 17.26 | 16.01 | 8.23  | 82.24 | 35-251 | 1719000 | 35.4 | 33.2 | 98.95 | 55.81  | 0 | 384.92 | 148241 | 98.695 | 143 |
| 12 | CFSAN002236 | Escherichia coli                                       | SAMN07210945 | SRRS805589 | 920  | 92.71 | 17.26 | 16.01 | 8.23  | 82.24 | 35-251 | 2549826 | 35.6 | 32.9 | 97.77 | 53.92  | 0 | 252.01 | 162945 | 98.728 | 210 |
| 12 | CFSAN008100 | Listeria monocytogenes                                 | SAMN07210931 | SRRS805875 | 920  | 92.71 | 17.26 | 16.01 | 8.23  | 82.24 | 35-251 | 1527866 | 36.6 | 35.2 | 99.39 | 82.6   | 0 | 378.53 | 161120 | 98.493 | 116 |
| 12 | CFSAN008100 | Listeria monocytogenes                                 | SAMN07210931 | SRRS805879 | 920  | 92.71 | 17.26 | 16.01 | 8.23  | 82.24 | 35-251 | 2502086 | 36.8 | 35.9 | 99.23 | 90.5   | 0 | 247.96 | 353282 | 98.498 | 78  |
| 12 | CFSAN030807 | Shigella sonnei                                        | SAMN07210932 | SRRS806467 | 920  | 92.71 | 17.26 | 16.01 | 8.23  | 82.24 | 35-251 | 1300096 | 35.1 | 32.4 | 98.46 | 43.65  | 0 | 448.18 | 19757  | 88.353 | 557 |
| 12 | CFSAN030807 | Shigella sonnei                                        | SAMN07210932 | SRRS806465 | 920  | 92.71 | 17.26 | 16.01 | 8.23  | 82.24 | 35-251 | 2413482 | 35.8 | 33.1 | 97.49 | 46.67  | 0 | 253.65 | 21854  | 89.06  | 596 |
| 12 | CFSAN02805  | Campylobacter coli                                     | SAMN07210933 | SRRS805522 | 920  | 92.71 | 17.26 | 16.01 | 8.23  | 82.24 | 35-251 | 1329598 | 36.9 | 35.7 | 99.53 | 117.16 | 0 | 351.25 | 72057  | 98.474 | 98  |
| 12 | CFSAN032806 | Campylobacter coli                                     | SAMN07210933 | SRRS805542 | 920  | 92.71 | 17.26 | 16.01 | 8.23  | 82.24 | 35-251 | 2571886 | 37   | 35.2 | 99.13 | 134.91 | 0 | 207.68 | 130360 | 98.565 | 47  |
| 12 | CFSAN032806 | Campylobacter jejuni                                   | SAMN07210930 | SRRS805544 | 920  | 92.71 | 17.26 | 16.01 | 8.23  | 82.24 | 35-251 | 984576  | 36.9 | 35.3 | 99.22 | 88.65  | 1 | 392.92 | 62170  | 96.622 | 113 |
| 12 | CFSAN032806 | Campylobacter jejuni                                   | SAMN07210930 | SRRS805545 | 920  | 92.71 | 17.26 | 16.01 | 8.23  | 82.24 | 35-251 | 2432534 | 36.8 | 35.8 | 98.83 | 106.72 | 1 | 186.88 | 84890  | 96.764 | 121 |
| 13 | CFSAN000255 | Salmonella enterica subsp. enterica serovar Montevideo | SAMN07210937 | SRRS911617 | 1260 | 86.93 | 23.48 | 20.41 | 10.49 | 80.35 | 35-251 | 2076112 | 34.2 | 29.4 | 96.94 | 74.26  | 0 | 433.66 | 186593 | 99.117 | 206 |
| 13 | CFSAN000255 | Salmonella enterica subsp. enterica serovar Montevideo | SAMN07210937 | SRRS912121 | 1260 | 86.93 | 23.48 | 20.41 | 10.49 | 80.35 | 35-251 | 2952848 | 34.4 | 32.2 | 98.54 | 112.14 | 0 | 434.76 | 422825 | 99.141 | 136 |
| 13 | CFSAN000318 | Salmonella enterica subsp. enterica serovar Heidelberg | SAMN07210938 | SRRS942478 | 1260 | 86.93 | 23.48 | 20.41 | 10.49 | 80.35 | 35-251 | 3253230 | 34.5 | 30.1 | 97.34 | 105    | 0 | 397.53 | 221495 | 99.199 | 227 |
| 13 | CFSAN000318 | Salmonella enterica subsp. enterica serovar Heidelberg | SAMN07210938 | SRRS910642 | 1260 | 86.93 | 23.48 | 20.41 | 10.49 | 80.35 | 35-251 | 2773062 | 34.4 | 32   | 98.12 | 91.06  | 0 | 396.12 | 189616 | 99.203 | 150 |
| 13 | CFSAN001178 | Listeria monocytogenes                                 | SAMN07210944 | SRRS910650 | 1260 | 86.93 | 23.48 | 20.41 | 10.49 | 80.35 | 35-251 | 2219824 | 35.9 | 34.1 | 99.19 | 118.43 | 0 | 374.69 | 255510 | 99.031 | 141 |
| 13 | CFSAN001178 | Listeria monocytogenes                                 | SAMN07210944 | SRRS911614 | 1260 | 86.93 | 23.48 | 20.41 | 10.49 | 80.35 | 35-251 | 2794420 | 35.7 | 33.3 | 99.16 |        |   |        |        |        |     |

|    |             |                                                        |              |            |      |       |       |       |       |       |        |         |      |      |       |        |   |          |         |        |     |
|----|-------------|--------------------------------------------------------|--------------|------------|------|-------|-------|-------|-------|-------|--------|---------|------|------|-------|--------|---|----------|---------|--------|-----|
| 15 | CFSAN000318 | Salmonella enterica subsp. enterica serovar Heidelberg | SAMN07210938 | SRRS806418 |      | NA    | NA    | NA    | NA    | NA    | 35-251 | 1918662 | 34.3 | 32.6 | 98.53 | 61.37  | 0 | 363.05   | 25985.4 | 99.218 | 121 |
| 15 | CFSAN001178 | Listeria monocytogenes                                 | SAMN07210944 | SRRS805852 | 414  | 96.41 | 7.98  | 7.69  | 3.95  | 84.75 | 35-251 | 794634  | 37.1 | 35.2 | 99.36 | 46.85  | 0 | 454.23   | 27263.3 | 99.039 | 49  |
| 15 | CFSAN002236 | Escherichia coli                                       | SAMN07210945 | SRRS805585 | 414  | 96.41 | 7.98  | 7.69  | 3.95  | 84.75 | 35-251 | 1090220 | 36.3 | 33.4 | 98.73 | 36.86  | 0 | 471.59   | 161548  | 98.703 | 129 |
| 15 | CFSAN008100 | Listeria monocytogenes                                 | SAMN07210931 | SRRS805851 | 414  | 96.41 | 7.98  | 7.69  | 3.95  | 84.75 | 35-251 | 633854  | 36.9 | 33.5 | 98.69 | 36.81  | 0 | 471.67   | 28501.3 | 98.473 | 251 |
| 15 | CFSAN030807 | Shigella sonnei                                        | SAMN07210932 | SRRS806415 | 414  | 96.41 | 7.98  | 7.69  | 3.95  | 84.75 | 35-251 | 907740  | 36.2 | 33.2 | 98.54 | 31.69  | 0 | 524.37   | 21828   | 88.676 | 538 |
| 15 | CFSAN032805 | Campylobacter coli                                     | SAMN07210933 | SRRS805543 | 414  | 96.41 | 7.98  | 7.69  | 3.95  | 84.75 | 35-251 | 619518  | 37.4 | 35.4 | 99.42 | 59.44  | 0 | 420.74   | 169809  | 98.769 | 57  |
| 15 | CFSAN032806 | Campylobacter jejuni                                   | SAMN07210930 | SRRS805541 | 414  | 96.41 | 7.98  | 7.69  | 3.95  | 84.75 | 35-251 | 635066  | 37.3 | 36.1 | 62.03 | 31.84  | 1 | 362.46   | 45937   | 96.686 | 485 |
| 16 | CFSAN000255 | Salmonella enterica subsp. enterica serovar Montevideo | SAMN07210937 | SRRS806410 | 1279 | 85.32 | 24.38 | 20.8  | 10.69 | 72.12 | 35-251 | 2486162 | 33.6 | 30.1 | 97.74 | 82.2   | 0 | 382.92   | 364987  | 99.171 | 104 |
| 16 | CFSAN000318 | Salmonella enterica subsp. enterica serovar Heidelberg | SAMN07210938 | SRRS805854 | 1279 | 85.32 | 24.38 | 20.8  | 10.69 | 72.12 | 35-251 | 2409148 | 33.3 | 29.3 | 97.19 | 72.39  | 1 | 376.53   | 423434  | 99.218 | 137 |
| 16 | CFSAN001178 | Listeria monocytogenes                                 | SAMN07210944 | SRRS805860 | 1279 | 85.32 | 24.38 | 20.8  | 10.69 | 72.12 | 35-251 | 1854464 | 34.9 | 32   | 99.14 | 93.87  | 0 | 347.72   | 476905  | 99.03  | 90  |
| 16 | CFSAN002236 | Escherichia coli                                       | SAMN07210945 | SRRS805586 | 1279 | 85.32 | 24.38 | 20.8  | 10.69 | 72.12 | 35-251 | 3234242 | 33.6 | 29.1 | 96.71 | 82.73  | 2 | 331.54   | 185204  | 98.751 | 151 |
| 16 | CFSAN008100 | Listeria monocytogenes                                 | SAMN07210931 | SRRS805850 | 1279 | 85.32 | 24.38 | 20.8  | 10.69 | 72.12 | 35-251 | 1830302 | 34.7 | 30.7 | 98.54 | 81.51  | 0 | 324.53   | 353282  | 98.507 | 122 |
| 16 | CFSAN030807 | Shigella sonnei                                        | SAMN07210932 | SRRS806410 | 1279 | 85.32 | 24.38 | 20.8  | 10.69 | 72.12 | 35-251 | 3467008 | 33.7 | 28.5 | 95.22 | 71.66  | 0 | 323.46   | 21862   | 89.122 | 568 |
| 16 | CFSAN032805 | Campylobacter coli                                     | SAMN07210933 | SRRS805519 | 1279 | 85.32 | 24.38 | 20.8  | 10.69 | 72.12 | 35-251 | 1729202 | 35.6 | 32.7 | 98.89 | 114.95 | 0 | 266.79   | 165134  | 98.748 | 138 |
| 16 | CFSAN032806 | Campylobacter jejuni                                   | SAMN07210930 | SRRS805520 | 1279 | 85.32 | 24.38 | 20.8  | 10.69 | 72.12 | 35-251 | 1147182 | 35.4 | 30.9 | 98.46 | 87.07  | 1 | 334.01   | 64862   | 97.075 | 150 |
| 17 | CFSAN000255 | Salmonella enterica subsp. enterica serovar Montevideo | SAMN07210937 | SRRS806429 | 1220 | 91.27 | 23.12 | 21.1  | 10.85 | 80.52 | 35-251 | 1929840 | 35.3 | 33.3 | 97.96 | 43.17  | 0 | 243.26   | 440987  | 99.181 | 135 |
| 17 | CFSAN000255 | Salmonella enterica subsp. enterica serovar Montevideo | SAMN07210937 | SRRS806426 | 1220 | 91.27 | 23.12 | 21.1  | 10.85 | 80.52 | 35-251 | 3539004 | 35.4 | 33.1 | 98.03 | 83.38  | 0 | 259.17   | 440987  | 99.184 | 143 |
| 17 | CFSAN000318 | Salmonella enterica subsp. enterica serovar Heidelberg | SAMN07210938 | SRRS806427 | 1220 | 91.27 | 23.12 | 21.1  | 10.85 | 80.52 | 35-251 | 1328786 | 34.7 | 29.7 | 96.97 | 45.94  | 0 | 436.62   | 259788  | 99.214 | 150 |
| 17 | CFSAN000318 | Salmonella enterica subsp. enterica serovar Heidelberg | SAMN07210938 | SRRS806422 | 1220 | 91.27 | 23.12 | 21.1  | 10.85 | 80.52 | 35-251 | 2575330 | 35.1 | 32.8 | 98.97 | 69.3   | 0 | 314.8    | 259743  | 99.231 | 154 |
| 17 | CFSAN001178 | Listeria monocytogenes                                 | SAMN07210944 | SRRS805865 | 1220 | 91.27 | 23.12 | 21.1  | 10.85 | 80.52 | 35-251 | 2074390 | 36.4 | 34.4 | 99.45 | 112.51 | 1 | 373.47   | 548130  | 99.046 | 73  |
| 17 | CFSAN001178 | Listeria monocytogenes                                 | SAMN07210944 | SRRS805871 | 1220 | 91.27 | 23.12 | 21.1  | 10.85 | 80.52 | 35-251 | 2749682 | 36.4 | 34.7 | 99.45 | 127.16 | 1 | 312.9    | 477130  | 99.056 | 61  |
| 17 | CFSAN002236 | Escherichia coli                                       | SAMN07210945 | SRRS805576 | 1220 | 91.27 | 23.12 | 21.1  | 10.85 | 80.52 | 35-251 | 1569012 | 35.5 | 34   | 98.34 | 34.47  | 1 | 256.77   | 190130  | 98.778 | 121 |
| 17 | CFSAN002236 | Escherichia coli                                       | SAMN07210945 | SRRS805590 | 1220 | 91.27 | 23.12 | 21.1  | 10.85 | 80.52 | 35-251 | 2246446 | 35.5 | 33.8 | 98.37 | 50.4   | 2 | 263.81   | 190130  | 98.799 | 124 |
| 17 | CFSAN008100 | Listeria monocytogenes                                 | SAMN07210931 | SRRS805868 | 1220 | 91.27 | 23.12 | 21.1  | 10.85 | 80.52 | 35-251 | 3710430 | 36.4 | 35.1 | 99.23 | 166.4  | 0 | 315.13   | 355825  | 98.413 | 209 |
| 17 | CFSAN008100 | Listeria monocytogenes                                 | SAMN07210931 | SRRS805872 | 1220 | 91.27 | 23.12 | 21.1  | 10.85 | 80.52 | 35-251 | 1832204 | 36.1 | 33.1 | 98.93 | 110.44 | 0 | 453.49   | 348077  | 98.524 | 177 |
| 17 | CFSAN030807 | Shigella sonnei                                        | SAMN07210932 | SRRS806424 | 1220 | 91.27 | 23.12 | 21.1  | 10.85 | 80.52 | 35-251 | 3127086 | 35.7 | 33.6 | 97.92 | 58.42  | 0 | 242.29   | 21397   | 89.281 | 511 |
| 17 | CFSAN030807 | Shigella sonnei                                        | SAMN07210932 | SRRS806437 | 1220 | 91.27 | 23.12 | 21.1  | 10.85 | 80.52 | 35-251 | 2604576 | 35.6 | 34.2 | 98.28 | 54.55  | 1 | 267.44   | 22029   | 89.314 | 519 |
| 18 | CFSAN000318 | Salmonella enterica subsp. enterica serovar Heidelberg | SAMN07210938 | SRRS805847 | 986  | 91.49 | NA    | NA    | NA    | 83.5  | 35-251 | 3056870 | 35   | 32.3 | 98.17 | 88.22  | 0 | 342.79   | 266303  | 99.201 | 127 |
| 18 | CFSAN001178 | Listeria monocytogenes                                 | SAMN07210944 | SRRS805572 | 986  | 91.49 | NA    | NA    | NA    | 83.5  | 35-251 | 2063854 | 36.5 | 34.1 | 99.14 | 101.32 | 3 | 338.35   | 255509  | 99.053 | 68  |
| 18 | CFSAN002236 | Escherichia coli                                       | SAMN07210945 | SRRS805568 | 986  | 91.49 | NA    | NA    | NA    | 83.5  | 35-251 | 2165412 | 34.7 | 31.5 | 98.36 | 69.42  | 0 | 401.75   | 176340  | 98.722 | 166 |
| 18 | CFSAN008100 | Listeria monocytogenes                                 | SAMN07210931 | SRRS805567 | 986  | 91.49 | NA    | NA    | NA    | 83.5  | 35-251 | 2089152 | 35.7 | 33.1 | 99.05 | 97.63  | 1 | 328.31   | 353282  | 98.626 | 90  |
| 18 | CFSAN030807 | Shigella sonnei                                        | SAMN07210932 | SRRS805967 | 986  | 91.49 | NA    | NA    | NA    | 83.5  | 35-251 | 2377832 | 35.1 | 32.7 | 98.21 | 66.02  | 0 | 365.34   | 21898   | 88.743 | 547 |
| 18 | CFSAN032805 | Campylobacter coli                                     | SAMN07210933 | SRRS805478 | 986  | 91.49 | NA    | NA    | NA    | 83.5  | 35-251 | 1747534 | 36.8 | 36.1 | 99.45 | 133.91 | 0 | 302.39   | 86641   | 98.764 | 226 |
| 18 | CFSAN032806 | Campylobacter jejuni                                   | SAMN07210930 | SRRS805462 | 986  | 91.49 | NA    | NA    | NA    | 83.5  | 35-251 | 2462464 | 36.9 | 36.1 | 99.23 | 135.55 | 1 | 242.19   | 51766   | 96.479 | 102 |
| 19 | CFSAN000255 | Salmonella enterica subsp. enterica serovar Montevideo | SAMN07210937 | SRRS805963 | 918  | 91.19 | NA    | NA    | 8.1   | 82.1  | 35-251 | 3322360 | 34.9 | 31.1 | 98.05 | 130.77 | 1 | 476.05   | 684920  | 99.196 | 92  |
| 19 | CFSAN000318 | Salmonella enterica subsp. enterica serovar Heidelberg | SAMN07210938 | SRRS805846 | 918  | 91.19 | NA    | NA    | 8.1   | 82.1  | 35-251 | 2352160 | 34.8 | 29.4 | 96.82 | 89.18  | 0 | 511.14   | 437894  | 99.216 | 105 |
| 19 | CFSAN001178 | Listeria monocytogenes                                 | SAMN07210944 | SRRS805560 | 918  | 91.19 | NA    | NA    | 8.1   | 82.1  | 35-251 | 1079018 | 36.3 | 33.3 | 99.25 | 70.68  | 3 | 485.04   | 548130  | 99.057 | 87  |
| 19 | CFSAN002236 | Escherichia coli                                       | SAMN07210945 | SRRS805556 | 918  | 91.19 | NA    | NA    | 8.1   | 82.1  | 35-251 | 2661454 | 34.9 | 32.6 | 98.79 | 104.46 | 0 | 518.81   | 189159  | 98.743 | 249 |
| 19 | CFSAN008100 | Listeria monocytogenes                                 | SAMN07210931 | SRRS805559 | 918  | 91.19 | NA    | NA    | 8.1   | 82.1  | 35-251 | 790864  | 36.2 | 31.3 | 98.33 | 46.99  | 0 | 441.66   | 189826  | 98.547 | 120 |
| 19 | CFSAN030807 | Shigella sonnei                                        | SAMN07210932 | SRRS805964 | 918  | 91.19 | NA    | NA    | 8.1   | 82.1  | 35-251 | 993890  | 34.7 | 31.1 | 97.51 | 33.96  | 0 | 539.11   | 21674   | 88.394 | 607 |
| 19 | CFSAN032805 | Campylobacter coli                                     | SAMN07210933 | SRRS805480 | 918  | 91.19 | NA    | NA    | 8.1   | 82.1  | 35-251 | 754330  | 36.7 | 35.6 | 99.52 | 81.69  | 1 | 449.57   | 165134  | 98.717 | 211 |
| 19 | CFSAN032806 | Campylobacter jejuni                                   | SAMN07210930 | SRRS805481 | 918  | 91.19 | NA    | NA    | 8.1   | 82.1  | 35-251 | 697948  | 36.6 | 34.7 | 99.28 | 61.62  | 1 | 380.69   | 62739   | 96.944 | 195 |
| 20 | CFSAN000255 | Salmonella enterica subsp. enterica serovar Montevideo | SAMN07210937 | SRRS805970 | 828  | 92.62 | 15.7  | 14.54 | 7.44  | 80.47 | 35-250 | 1698042 | 34.8 | 32.3 | 98.47 | 63.75  | 0 | 481.38   | 511299  | 99.179 | 67  |
| 20 | CFSAN000318 | Salmonella enterica subsp. enterica serovar Heidelberg | SAMN07210938 | SRRS805849 | 828  | 92.62 | 15.7  | 14.54 | 7.44  | 80.47 | 35-250 | 3067102 | 35.4 | 33.5 | 98.47 | 90.59  | 0 | 363.57   | 725244  | 99.218 | 115 |
| 20 | CFSAN001178 | Listeria monocytogenes                                 | SAMN07210944 | SRRS805565 | 828  | 92.62 | 15.7  | 14.54 | 7.44  | 80.47 | 35-250 | 1376904 | 36.7 | 35.2 | 99.01 | 54.05  | 0 | 269.54   | 548130  | 99.042 | 71  |
| 20 | CFSAN002236 | Escherichia coli                                       | SAMN07210945 | SRRS805575 | 828  | 92.62 | 15.7  | 14.54 | 7.44  | 80.47 | 35-250 | 2841996 | 35.5 | 34.6 | 98.57 | 70.13  | 0 | 297.04   | 186967  | 98.749 | 163 |
| 20 | CFSAN008100 | Listeria monocytogenes                                 | SAMN07210931 | SRRS805573 | 828  | 92.62 | 15.7  | 14.54 | 7.44  | 80.47 | 35-250 | 1483720 | 36.4 | 35.6 | 99.2  | 68.61  | 0 | 330.94   | 353282  | 98.519 | 116 |
| 20 | CFSAN030807 | Shigella sonnei                                        | SAMN07210932 | SRRS805966 | 828  | 92.62 | 15.7  | 14.54 | 7.44  | 80.47 | 35-250 | 2291552 | 35.6 | 34.5 | 98.21 | 52.98  | 0 | 307.21   | 21425   | 88.865 | 522 |
| 20 | CFSAN032805 | Campylobacter coli                                     | SAMN07210933 | SRRS805515 | 828  | 92.62 | 15.7  | 14.54 | 7.44  | 80.47 | 35-250 | 397922  | 36.4 | 33   | 99.01 | 41.27  | 0 | 448.21   | 216026  | 98.87  | 65  |
| 20 | CFSAN032806 | Campylobacter jejuni                                   | SAMN07210930 | SRRS805513 | 828  | 92.62 | 15.7  | 14.54 | 7.44  | 80.47 | 35-250 | 693996  | 36.8 | 34.5 | 99.05 | 52.42  | 1 | 326      | 104400  | 97.246 | 135 |
| 21 | CFSAN000255 | Salmonella enterica subsp. enterica serovar Montevideo | SAMN07210937 | SRRS805968 | 896  | 91.85 | NA    | NA    | NA    | 80.96 | 35-251 | 2188002 | 35   | 30.4 | 98.08 | 85.07  | 0 | 480.48   | 422657  | 99.163 | 74  |
| 21 | CFSAN000318 | Salmonella enterica subsp. enterica serovar Heidelberg | SAMN07210938 | SRRS805845 | 896  | 91.85 | NA    | NA    | NA    | 80.96 | 35-251 | 2138130 | 35.1 | 30.5 | 97.89 | 76.67  | 0 | 476.5    | 259788  | 99.196 | 120 |
| 21 | CFSAN001178 | Listeria monocytogenes                                 | SAMN07210944 | SRRS805566 | 896  | 91.85 | NA    | NA    | NA    | 80.96 | 35-251 | 1979908 | 36.4 | 31.4 | 98.6  | 116.92 | 1 | 445.93   | 265665  | 99.019 | 61  |
| 21 | CFSAN002236 | Escherichia coli                                       | SAMN07210945 | SRRS805570 | 896  | 91.85 | NA    | NA    | NA    | 80.96 | 35-251 | 1925110 | 35.1 | 29.7 | 97.74 | 68.99  | 0 | 499.06   | 158690  | 98.697 | 156 |
| 21 | CFSAN008100 | Listeria monocytogenes                                 | SAMN07210931 | SRRS805569 | 896  | 91.85 | NA    | NA    | NA    | 80.96 | 35-251 | 1728250 | 36.2 | 33.9 | 99.25 | 101.99 | 0 | 453.98</ |         |        |     |

**Supplemental Table 2.** Run metrics submitted by the labs.

| Lab         | ClusterDensity | PercClustersPF | Reads_M   | ReadsPF_M | Yield    | Q30       |
|-------------|----------------|----------------|-----------|-----------|----------|-----------|
| 1           | 463            | 97.46          | 9.04      | 8.81      | 4.6      | 91.3      |
| 2           | NA             | NA             | NA        | NA        | NA       | NA        |
| 3           | NA             | NA             | NA        | NA        | NA       | NA        |
| 4           | 887            | 90.84          | 16.99     | 15.44     | 7.93     | 84.15     |
| 5           | 909            | 91.22          | 17.02     | 15.52     | 7.98     | 83.53     |
| 6           | 1203           | 88.51          | 22.69     | 20.09     | 10.32    | 75.57     |
| 6           | 1335           | 88.97          | 25.19     | 22.42     | 11.52    | 73.12     |
| 11          | 1307           | 80.84          | 23.53     | 19.06     | 9.8      | 73.78     |
| 9           | 862            | 87.63          | 16.08     | 14.09     | 7.24     | 78.34     |
| 10          | 658            | 95.88          | 12.69     | 12.16     | 6.25     | 81.46     |
| 13          | 1260           | 86.93          | 23.48     | 20.41     | 10.49    | 80.35     |
| 12          | 920            | 92.71          | 17.26     | 16.01     | 8.23     | 82.24     |
| 8           | NA             | NA             | NA        | NA        | NA       | NA        |
| 7           | 927            | 94.53          | 17.71     | 16.74     | 8.6      | 86.8      |
| 17          | 1220           | 91.27          | 23.12     | 21.1      | 10.85    | 80.52     |
| 14          | 877            | 94.15          | 16.8      | 15.82     | 8.13     | 82.53     |
| 15          | 414            | 96.41          | 7.98      | 7.69      | 3.95     | 84.75     |
| 16          | 1279           | 85.32          | 24.38     | 20.8      | 10.69    | 72.12     |
| 20          | 828            | 92.62          | 15.7      | 14.54     | 7.44     | 80.47     |
| 18          | 986            | 91.49          | NA        | NA        | NA       | 83.5      |
| 19          | 918            | 91.19          | NA        | NA        | 8.1      | 82.1      |
| 21          | 896            | 91.85          | NA        | NA        | NA       | 80.96     |
| <b>AVG:</b> | <b>955</b>     | <b>91</b>      | <b>18</b> | <b>16</b> | <b>8</b> | <b>81</b> |

**Supplemental Table 3.** SNP positions with respect to reference genome.

| Reference genome | Replicon          | SNP position | Number of PT submissions with SNP |
|------------------|-------------------|--------------|-----------------------------------|
| CFSAN000255      | chromosome        | 2636095      | 2                                 |
| CFSAN000255      | chromosome        | 2636324      | 3                                 |
| CFSAN000255      | chromosome        | 2636432      | 1                                 |
| CFSAN000318      | chromosome        | 1163678      | 1                                 |
| CFSAN000318      | chromosome        | 1522567      | 1                                 |
| CFSAN000318      | chromosome        | 3844854      | 1                                 |
| CFSAN000318      | chromosome        | 4213567      | 5                                 |
| CFSAN001178      | chromosome        | 71247        | 1                                 |
| CFSAN001178      | chromosome        | 203018       | 1                                 |
| CFSAN001178      | chromosome        | 908902       | 1                                 |
| CFSAN001178      | chromosome        | 1530728      | 2                                 |
| CFSAN001178      | chromosome        | 1676551      | 2                                 |
| CFSAN001178      | chromosome        | 1677026      | 1                                 |
| CFSAN001178      | chromosome        | 1903451      | 1                                 |
| CFSAN001178      | chromosome        | 2562265      | 1                                 |
| CFSAN001178      | chromosome        | 2704336      | 9                                 |
| CFSAN001178      | chromosome        | 2720398      | 1                                 |
| CFSAN001178      | chromosome        | 2756164      | 1                                 |
| CFSAN002236      | chromosome        | 758652       | 1                                 |
| CFSAN002236      | chromosome        | 804517       | 2                                 |
| CFSAN002236      | chromosome        | 1839592      | 2                                 |
| CFSAN002236      | chromosome        | 3690530      | 1                                 |
| CFSAN002236      | chromosome        | 3697978      | 1                                 |
| CFSAN002236      | plasmid_pO104_H21 | 156546       | 6                                 |
| CFSAN008100      | chromosome        | 187043       | 2                                 |
| CFSAN008100      | chromosome        | 1397275      | 2                                 |
| CFSAN008100      | chromosome        | 1955083      | 1                                 |
| CFSAN030807      | chromosome        | 1932106      | 1                                 |
| CFSAN032805      | chromosome        | 422302       | 1                                 |
| CFSAN032806      | chromosome        | 634014       | 18                                |
| CFSAN032806      | chromosome        | 775060       | 2                                 |

**Supplemental Table 4.** Spearman correlation table of run metrics and summary statistics. Significant positive and negative correlations are represented as + and -, respectively. The size of the symbols and font boldness represent the degree of correlation.

Spearman

|                | Reads    | MeanForRQ | MeanRevRQ | ReadsMapped(%) | MeanDepth | SNPs | MeanInsert | NG50 | GenomeFraction | Contigs | ClusterDensity | ClustersPF(%) | Reads(Mil) | ReadsPF(Mil) | ReadsPF(%) | Yield    | Q30      |
|----------------|----------|-----------|-----------|----------------|-----------|------|------------|------|----------------|---------|----------------|---------------|------------|--------------|------------|----------|----------|
| Reads          |          | -         | -         | -              | +         |      | -          | +    | +              |         | +              | -             | +          | +            | -          | +        | -        |
| MeanForRQ      | -        |           | <b>+</b>  | <b>+</b>       | +         | +    | -          |      | -              | -       | -              | <b>+</b>      | -          | -            | <b>+</b>   | -        | <b>+</b> |
| MeanRevRQ      | -        | <b>+</b>  |           | <b>+</b>       | +         | +    | -          |      | -              | -       | -              | <b>+</b>      | -          | -            | <b>+</b>   | -        | <b>+</b> |
| ReadsMapped(%) | -        | <b>+</b>  | <b>+</b>  |                | +         | +    |            |      | -              | -       | -              | <b>+</b>      | -          | -            | <b>+</b>   | -        | <b>+</b> |
| MeanDepth      | +        | +         | +         | +              |           |      |            | +    |                | -       | +              | -             | +          | +            | -          | +        |          |
| SNPs           | +        | +         | +         | +              |           |      |            |      |                | -       |                |               |            |              |            |          |          |
| MeanInsert     | -        | -         | -         | -              |           |      |            |      |                |         |                |               |            |              |            |          | +        |
| NG50           | +        |           |           |                | +         |      |            |      | +              |         | +              |               | +          | +            |            | +        |          |
| GenomeFraction | +        | -         | -         | -              |           |      |            |      |                | +       |                |               |            |              |            |          |          |
| Contigs        | -        | -         | -         | -              | -         | -    | -          | -    |                |         |                |               |            |              |            |          |          |
| ClusterDensity | <b>+</b> | -         | -         | -              | +         |      | -          | +    |                |         |                |               | <b>+</b>   | <b>+</b>     | -          | <b>+</b> | -        |
| ClustersPF(%)  | -        | <b>+</b>  | <b>+</b>  | <b>+</b>       | -         |      |            |      |                |         |                |               |            |              | <b>+</b>   | -        | <b>+</b> |
| Reads(Mil)     | +        | -         | -         | -              | +         |      |            | +    |                |         | <b>+</b>       |               |            | <b>+</b>     | -          | <b>+</b> | -        |
| ReadsPF(Mil)   | +        | -         | -         | -              | +         |      |            | +    |                |         | <b>+</b>       |               |            | <b>+</b>     | -          | <b>+</b> | -        |
| ReadsPF(%)     | -        | <b>+</b>  | <b>+</b>  | <b>+</b>       | -         |      |            |      |                |         |                | <b>+</b>      |            |              |            |          | <b>+</b> |
| Yield          | +        | -         | -         | -              | +         |      |            | +    |                |         | <b>+</b>       | -             | <b>+</b>   | <b>+</b>     | -          |          |          |
| Q30            | -        | +         | +         | +              |           |      | +          |      |                |         | -              | <b>+</b>      | -          | -            | <b>+</b>   | -        |          |

rho < 0.5      +  
 0.5 >= rho < 0.75      +  
 rho >= 0.75      **+**
